# Supplementary material for: Modulating the oxidation states in nickel–iron layered double hydroxides by natural cooling for enhanced oxygen evolution activity
Source: Royal Society of Chemistry journal article supplement (doi:10.1039/d1ce01345a), 2022-01-01
Supplement: d1ce01345a1.pdf [file d1ce01345a1.pdf]

## Supplementary Information

# Modulating the Oxidation States in Nickel–Iron Layered Double Hydroxides by Natural Cooling for Enhanced Oxygen Evolution Activity

Yong Wu<sup>a</sup>, Qin Zhang<sup>a</sup>, Cheng Bai<sup>a</sup>, Xinyu Zhang<sup>a</sup>, Xiaolin Hu<sup>b</sup>, Chaohe Xu<sup>b</sup>, Dongmei Li<sup>a</sup>, Peng Yu<sup>a\*</sup>,  
Xiaolong Guo<sup>a\*</sup>

<sup>a</sup>College of Physics and Electronic Engineering, Chongqing Key Laboratory of Photo-Electric  
Functional Materials, Chongqing Normal University, Chongqing 401331, China

<sup>b</sup>College of Aerospace Engineering, Chongqing University, Chongqing 400044, China

Email: [pengyu@cqnu.edu.cn](mailto:pengyu@cqnu.edu.cn) (P. Yu);

[guoxiaolong@cqnu.edu.cn](mailto:guoxiaolong@cqnu.edu.cn) (X. Guo);

## Experimental Section

### 1. Computational detail

Spin-polarized density functional theory (DFT) calculations were performed by utilizing the Vienna Ab-Initio Simulation Package (VASP) code [1] in this work. The projector augmented wave (PAW) [2] method was used to describe the ionic cores. And the electron exchange-correlation was modelled by Perdew-Burke-Ernzerhof (PBE) function within generalized gradient approximation (GGA) [3]. The Hubbard-U calculations were included with the value of  $U_{Ni}=6.5$ ,  $U_{Fe}=5.3$  [4, 5]. A cutoff energy of 450 eV was used for the plane-wave basis set. The convergence criterion was  $10^{-4}$  eV for energy and  $0.05\text{eV}/\text{\AA}$  for force. And the  $\Gamma$ -centered  $3*3*1$  k-point mesh were set for Brillouin Zone. The NiFe LDH surface was mimicked by cleaving the  $\text{Fe}(\text{OH})_2$  (010) surface from  $\text{Fe}(\text{OH})_2$  bulk cell and replace partial Fe atoms with Ni atoms of the relaxed  $\text{Fe}(\text{OH})_2$  (010) surface. Further, the surface H atoms of NiFe LDH were partially removed and the final structure was relaxed to represent the o-NiFe LDH surface. For all the surface structures, a  $15 \text{\AA}$  thick vacuum along the vertical direction was added to separate adjacent periodic images. During the geometry optimization, the bottom two six atomic layers of the structure were fixed and other atoms were allowed to relax.

The key OER steps include [6-8]:

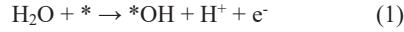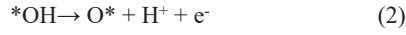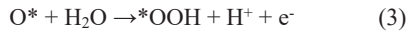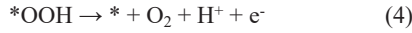

The adsorption free energy of intermediates were calculated using the equations:

$$\Delta G_{* \text{OH}} = G_{* \text{OH}} + \frac{1}{2} G_{\text{H}_2} - G_* - G_{* \text{H}_2\text{O}} - (eU)$$

$$\Delta G_{* \text{O}} = G_{* \text{O}} + G_{\text{H}_2} - G_* - G_{* \text{H}_2\text{O}} - (2eU)$$

$$\Delta G_{* \text{OOH}} = G_{* \text{OOH}} + \frac{3}{2} G_{\text{H}_2} - G_* - 2G_{* \text{H}_2\text{O}} - (3eU)$$

$$\Delta G_{* \text{O}_2} = G_{* \text{O}_2} + 2G_{\text{H}_2} - G_* - 2G_{* \text{H}_2\text{O}} - (4eU)$$

The Gibbs free energy  $G$  was calculated as follow:

$$G = E + ZPE - TS$$

where  $G$ ,  $E$ ,  $ZPE$  and  $TS$  are the free energy, total energy from DFT calculations, zero point energy and entropic contributions (T was set to be 300K), respectively. ZPE could be derived after frequency calculation by:

$$ZPE = \frac{1}{2} \sum h\nu_i$$

And the  $TS$  is entropic contributions (T was set to be 300K) values of adsorbed species are calculated after obtaining the vibrational frequencies

$$TS = k_B T \left[ \sum \ln \left( \frac{1}{1 - e^{-h\nu_i/k_B T}} \right) + \sum \frac{h\nu}{k_B T} \frac{1}{(e^{h\nu_i/k_B T} - 1)} + 1 \right]$$

## 2. Faraday efficiency

The Faraday efficiency (FE) of NiFe LDH/NF-36 h in OER was tested with a rotating ring-disk electrode (RRDE) method. with a glassy carbon disk (5.0 mm diameter) and Pt ring (5.0 mm ID/7.0 working electrode using mm OD). 15  $\mu$ L of NiFe LDH/NF-36 h was dispersed on the membrane 1 M KOH was used as the electrolyte. When a constant oxygen precipitation current is applied on the disc electrode, the oxygen generated at the disc electrode is dissolved in the electrolyte and then partially detected by the Pt ring electrode. At the same time, the Pt ring is set at a constant potential of 0.4 V (vs. RHE) for oxygen evolution reaction Prior to the measurement, the electrolyte will be saturated with an argon gas to completely remove the dissolved oxygen, and the rotation rate is kept at 1600 rpm during the test. The FE of NiFe LDH/NF-36 h is calculated as follows:  $FE = I_{ring} / (C_e * I_{disk})$  where  $I_{ring}$  and  $I_{disk}$  denote the ring current and disk current, respectively [9];  $C_e$  is the oxygen collection coefficient (0.37) for this type of electrode configuration.

## 3. ECSA corrected LSV

The specific activity was obtained using the method of normalizing the current to the electrochemically active surface area (ECSA). That is, the capacitance value in terms of area in various methods of estimating ECSA, the specific capacitance can be further converted to ECSA real surface area, ESCA can be calculated by the following equation:  $AESCA = C_{dl} / C_s$  [10]. The value of  $C_s$  was previously presented and discussed by Lyons and Brandon, where the specific capacitance per unit area ( $C_s$ ) obtained from a smooth  $Ni(OH)_2$  surface by Watzele and Bandarenka was 0.3 mF  $cm^{-2}$  [11], converting the  $C_s$  capacitance to the real surface area. Fabio Dionigi et al. concluded that the crystal structures of NiFe LDH catalysts and  $Ni(OH)_2$  are similar and their specific capacitance is expected to deviations are small. Therefore, the  $C_s$  values of  $Ni(OH)_2$  were used for all NiFe LDH catalysts [11]. Under this assumption, the method solves and overcomes the ECSA of NiFe LDH electrocatalysts.

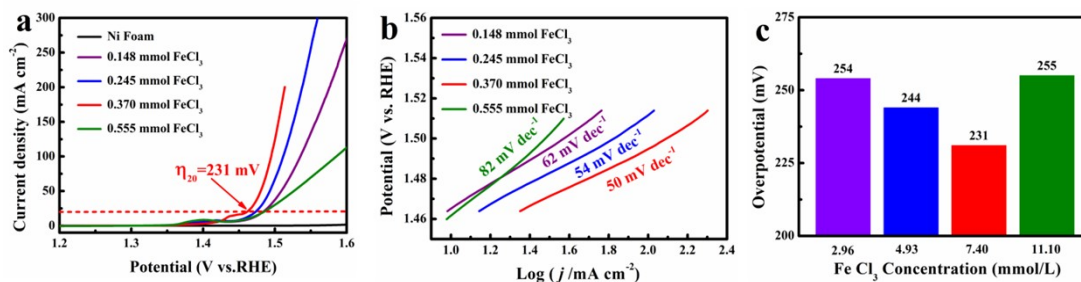

**Fig. S1** (a) The LSV of NiFe LDH with different FeCl<sub>3</sub> concentration as precursors, (b) the corresponding Tafel plots of the NiFe LDH with different FeCl<sub>3</sub> concentration, (c) the correlation between different FeCl<sub>3</sub> concentration and overpotential.

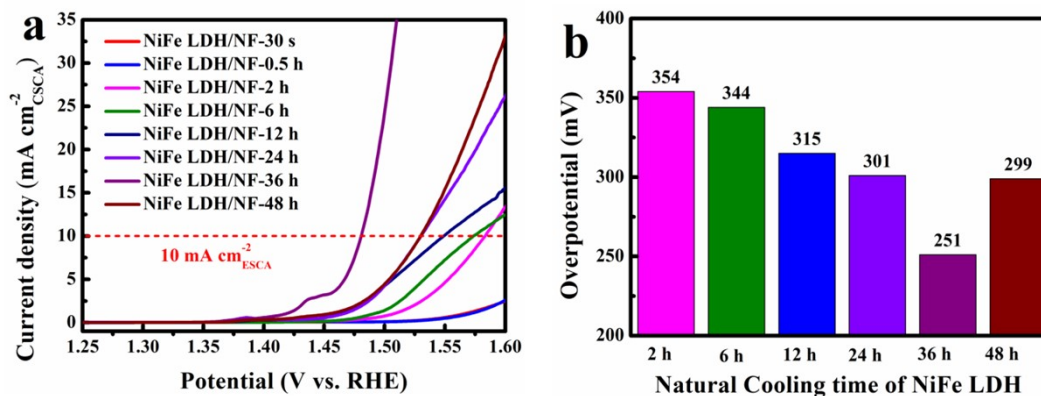

**Fig. S2** (a) Linear sweep voltammetry curves recorded the current densities normalized by the ECSA values (c). Dashed horizontal and vertical lines show the values of 10 mA cm<sup>-2</sup><sub>ECSA</sub>.

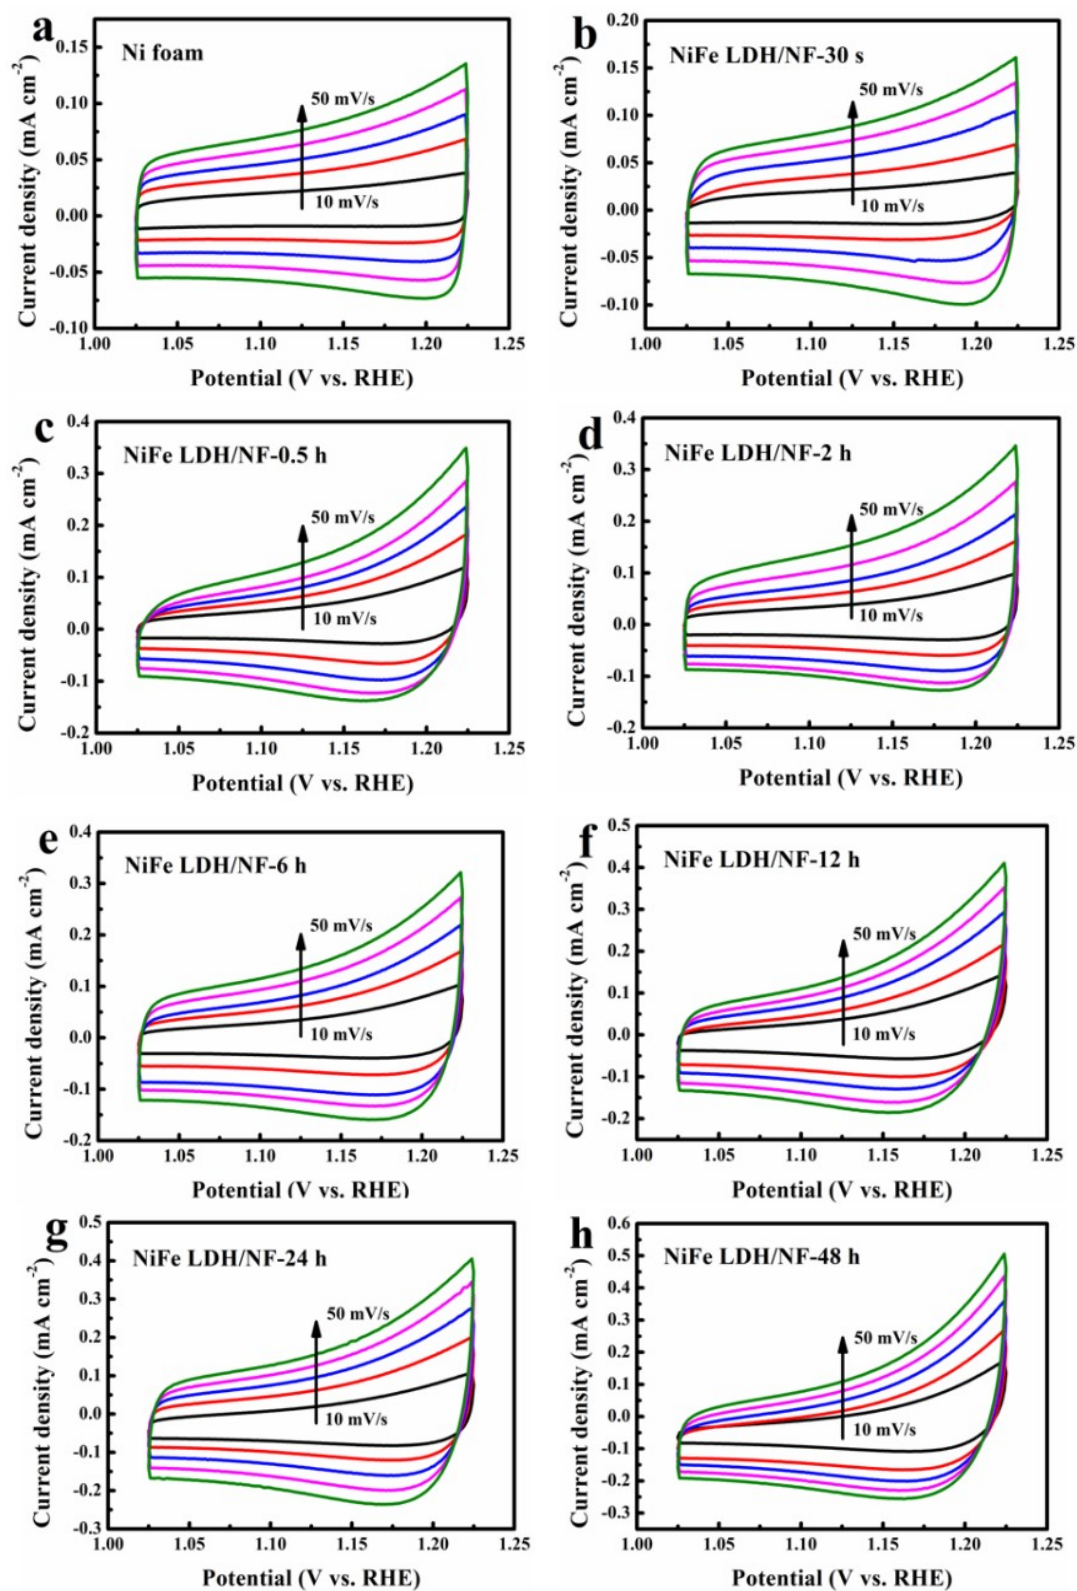

**Fig. S3** Depicts typical cyclic voltammetry (CV) curves of (a) Ni foam, (b) NiFe LDH/NF-30 s, (c) NiFe LDH/NF-0.5 h, (d) NiFe LDH/NF-2 h, (e) NiFe LDH/NF-6 h, (f) NiFe LDH/NF-12 h, (g) NiFe LDH/NF-24 h, (h) NiFe LDH/NF-48 h, respectively.

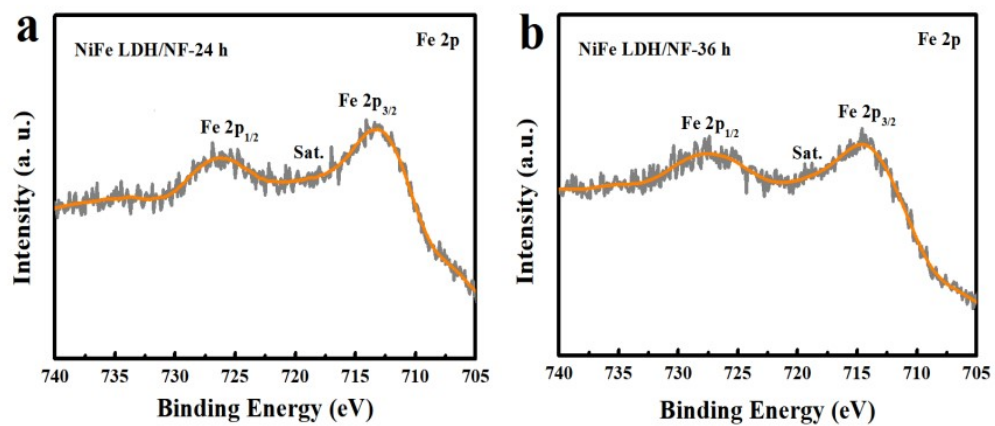

Fig. S4 XPS spectra of NiFe LDH: (a) Ni 2p, (b) Fe 2p.

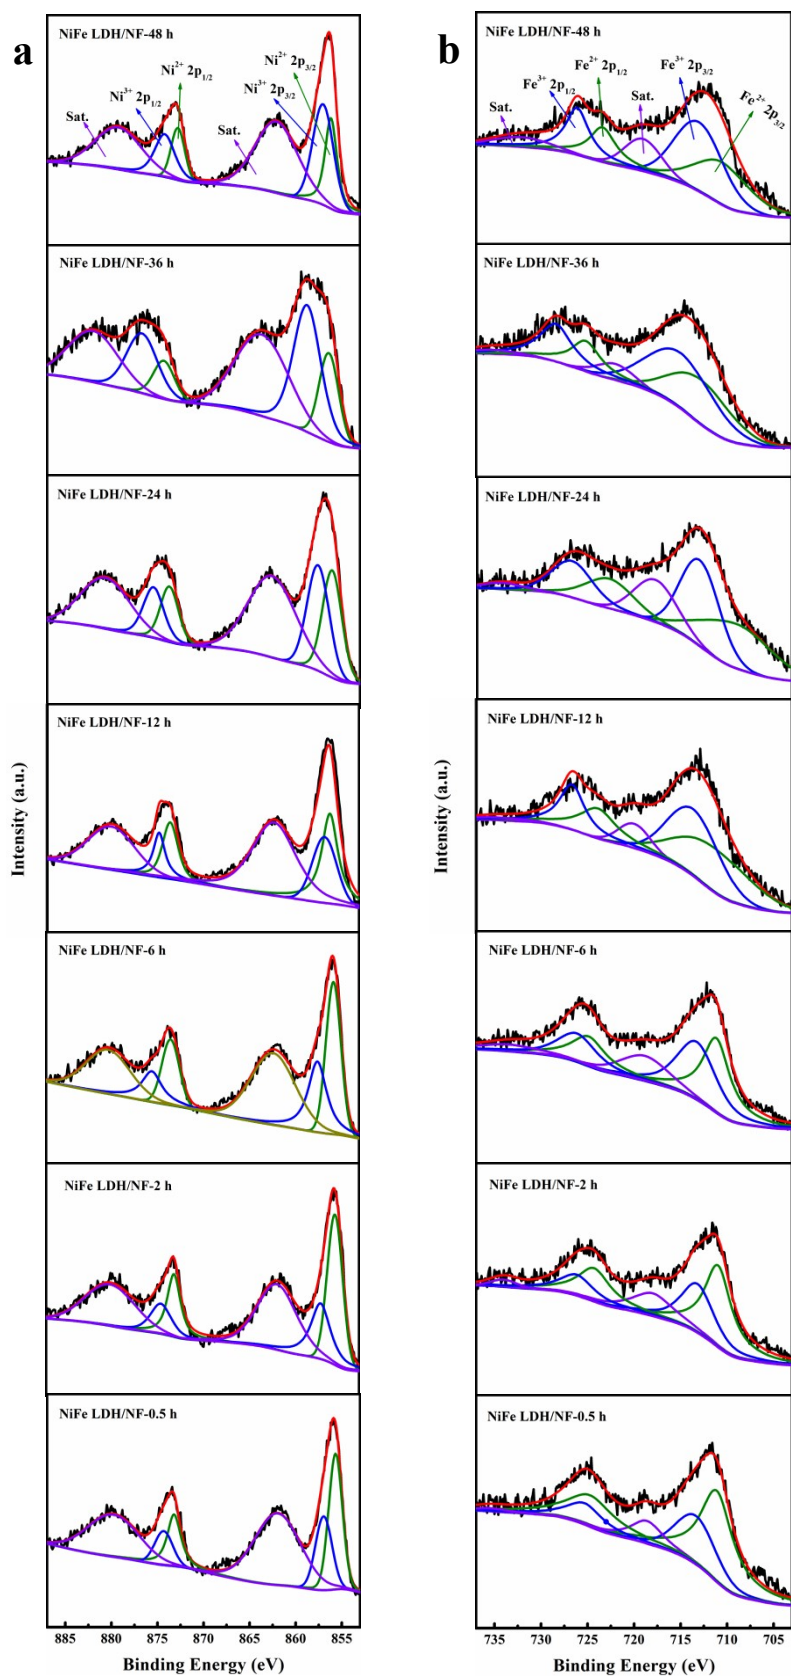

**Fig. S5** XPS of NiFe LDH/NF-0.5 h, NiFe LDH/NF-2 h, NiFe LDH/NF-6 h, NiFe LDH/NF-12 h, NiFe LDH/NF-24 h, NiFe LDH/NF-36 h, NiFe LDH/NF-48 h, respectively. (a) Ni 2p spectra. (b) Fe 2p spectra.

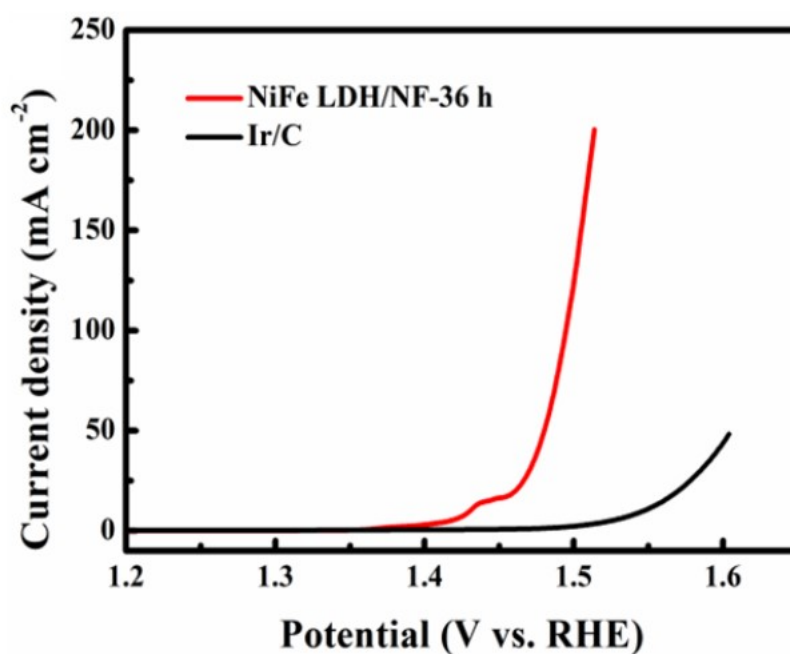

Fig. S6 OER polarization curves of NiFe LDH/N-36 h and Ir/C.

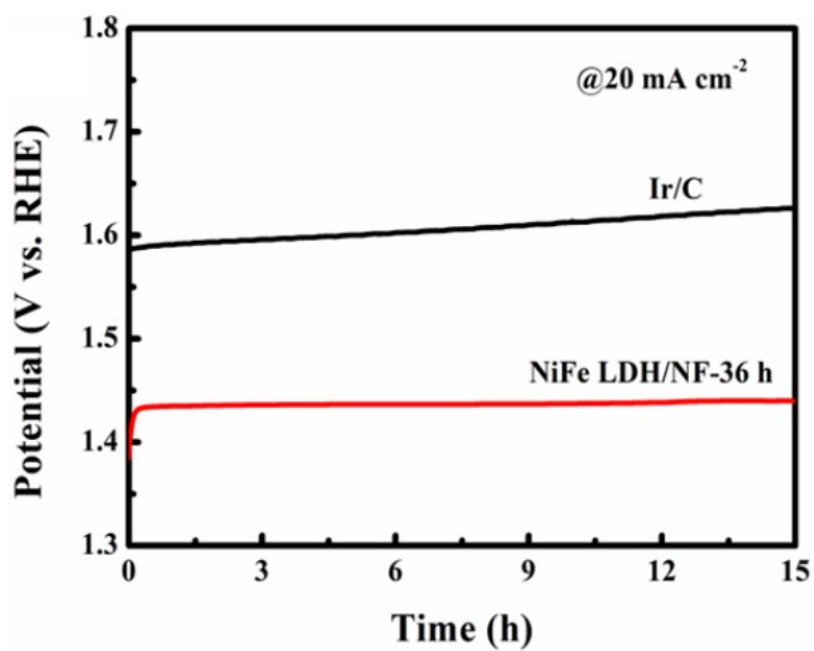

Fig. S7 Long-term stability of NiFe LDH/N-36 h and Ir/C at constant current density of  $20 \text{ mA} \cdot \text{cm}^{-2}$  for 15 h, respectively.



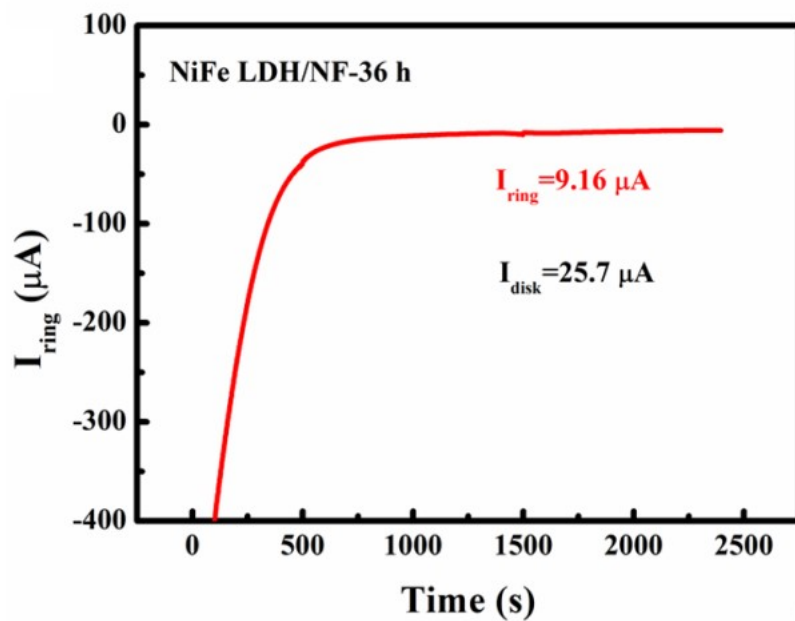

Fig. S8 The Faraday efficiency (FE) of NiFe LDH/NF-36 h during OER.

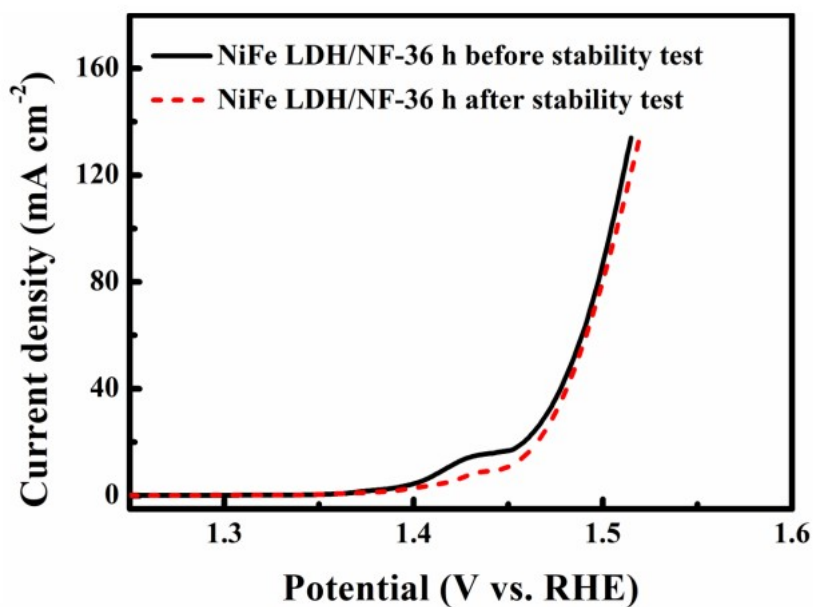

Fig S9. LSV of NiFe LDH/NF- 36h sample long-term stability test after.

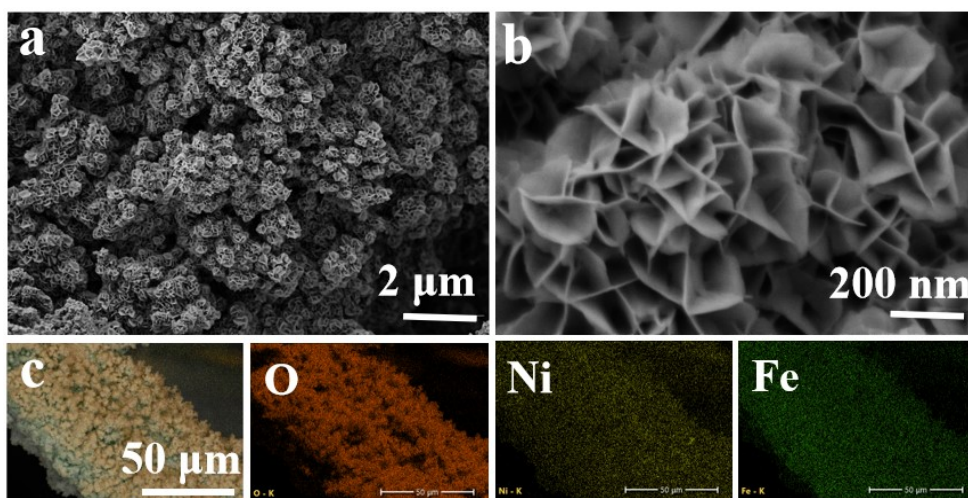

**Fig. S10** NiFe LDH/NF- 36h sample long-term stability test after. (a) and (b) SEM images, (c) the corresponding elemental mappings of Ni, Fe and O.

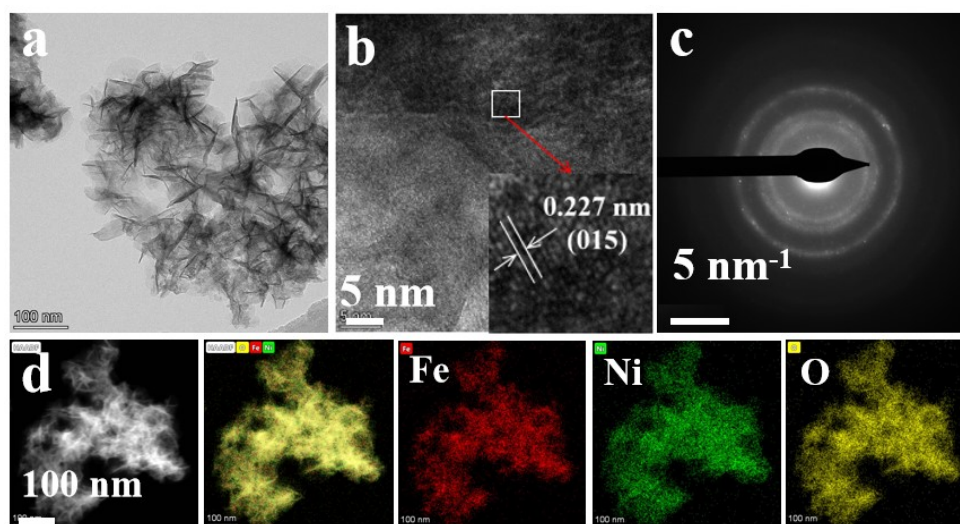

**Fig. S11** NiFe LDH/NF- 36h sample long-term stability test after: (a) TEM image, (b) HRTEM image, (c) SEAD image, (d) the corresponding elemental mappings of Ni, Fe and O.

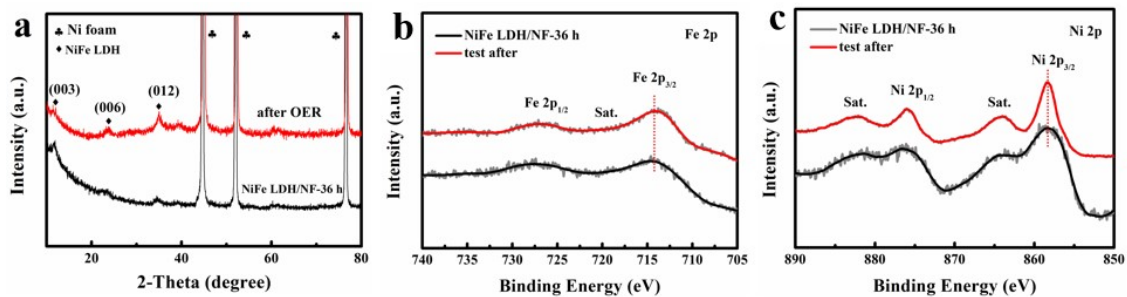

**Fig. S12** NiFe LDH/NF- 36h sample long-term stability test after. (a) XRD pattern, (b) Raman spectrum, (c) XPS spectra of Fe 2p, (d) XPS spectra of Ni 2p.

**Table S1** Loading mass of NiFe LDH with different natural cooling time.

| Natural cooling time | Loading mas (mg/cm <sup>2</sup> ) |
|----------------------|-----------------------------------|
| NiFe LDH-2 h         | 0.08                              |
| NiFe LDH-6 h         | 0.19                              |
| NiFe LDH-12 h        | 0.28                              |
| NiFe LDH-24 h        | 0.34                              |
| NiFe LDH-36 h        | 0.41                              |
| NiFe LDH-48 h        | 0.36                              |

**Table S2.** The atom ratio of Ni<sup>3+</sup>/Ni<sup>2+</sup> and Fe<sup>3+</sup>/Fe<sup>2+</sup> can be calculated by XPS.

| Natural cooling time | Ni <sup>3+</sup> /Ni <sup>2+</sup> | Fe <sup>3+</sup> /Fe <sup>2+</sup> |
|----------------------|------------------------------------|------------------------------------|
| NiFe LDH-0.5 h       | 0.581                              | 0.537                              |
| NiFe LDH-2 h         | 0.721                              | 0.782                              |
| NiFe LDH-6 h         | 0.782                              | 0.950                              |
| NiFe LDH-12 h        | 0.975                              | 1.000                              |
| NiFe LDH-24 h        | 1.105                              | 1.055                              |
| NiFe LDH-36 h        | 2.282                              | 1.325                              |
| NiFe LDH-48 h        | 1.481                              | 1.220                              |

**Table S3.** Comparison of OER activity of NiFe LDH (this work) with recently reported electrocatalysts in alkaline media. The overpotential was measured at the corresponding current density (10 mA cm<sup>-2</sup>).

| Catalyst                                                                | Substrate    | Medium     | $j$<br>(mA·cm <sup>-2</sup> ) | $\eta$<br>(mV) | Tafel slope<br>( mV dec <sup>-1</sup> ) | Reference        |
|-------------------------------------------------------------------------|--------------|------------|-------------------------------|----------------|-----------------------------------------|------------------|
| NiFe LDH                                                                | Ni foam      | 1 M KOH    | 20                            | 231            | 50                                      | <b>This work</b> |
| NiFe LDH                                                                | GC RDE       | 0.1 M KOH  | 10                            | 348            | –                                       | S[12]            |
| NiFe LDH                                                                | RDE          | 1 M KOH    | 10                            | 243            | 50                                      | S[13]            |
| NiFe LDH                                                                | Carbon paper | 1 M KOH    | 10                            | 247            | 37                                      | S[14]            |
| Ni-Fe LDH                                                               | Carbon paper | 1 M KOH    | 20                            | 246            | 71                                      | S[15]            |
| NiFeTiOOH                                                               | GC RDE       | 0.1 M KOH  | 10                            | 400            | –                                       | S[16]            |
| NiCoFe–LDH                                                              | CFP          | 1 M NaOH   | 10<br>20                      | 288<br>330     | 92                                      | S[17]            |
| Ni–Fe–Ce–LDH                                                            | GCE          | 1 M KOH    | 10                            | 242            | 34                                      | S[18]            |
| Ni <sub>60</sub> Fe <sub>40</sub>                                       | Ti foil      | 1 M NaOH   | 10                            | 300            | 38                                      | S[19]            |
| Ni <sub>65</sub> Fe <sub>35</sub> (OOH)                                 | Glass rod    | 0.1 M CsOH | 10                            | 295            | 38                                      | S[20]            |
| NiFe–MOFs                                                               | GCE          | 1 M KOH    | 10                            | 230            | 86.6                                    | S[21]            |
| NiFeCr                                                                  | Ni foam      | 1 M KOH    | 10                            | 265            | 41                                      | S[22]            |
| FeNi–HDNAs                                                              | Ni foam      | 1 M KOH    | 10                            | 260            | 91.66                                   | S[23]            |
| FeNi–Mo <sub>2</sub> C                                                  | GCE          | 1 M KOH    | 10                            | 288            | 38.8                                    | S[24]            |
| FeNiCoCrMn-HEG                                                          | Ni foam      | 1 M KOH    | 10                            | 229            | 40                                      | S[25]            |
| FeNi-SAs@NC                                                             | Carbon paper | 1 M KOH    | 10                            | 298            | 74.6                                    | S[26]            |
| NiCoFe–P–NP@<br>NiCoFe–PBA                                              | GCE          | 1 M KOH    | 10                            | 233            | 78                                      | S[27]            |
| Fe <sub>0.63</sub> Co <sub>0.19</sub> Ni <sub>0.18</sub> O <sub>x</sub> | FTO          | 1 M KOH    | 10                            | 247            | 38.23                                   | S[28]            |
| Ni-MoO <sub>2</sub> /NF–IH                                              | Ni foam      | 1 M KOH    | 10                            | 246            | 75                                      | S[29]            |
| Fe–doped–Ni <sub>2</sub> B                                              | Ni foam      | 1 M KOH    | 10                            | 257            | 110                                     | S[30]            |
| FeNi <sub>2</sub> S <sub>4</sub> NPs                                    | RDE          | 1 M KOH    | 10                            | 250            | 62                                      | S[31]            |
| Ni–CoP                                                                  | GCE          | 1 M KOH    | 10                            | 290            | 41                                      | S[32]            |

|                                                  |              |           |    |     |       |       |
|--------------------------------------------------|--------------|-----------|----|-----|-------|-------|
| NiFe–Se                                          | CFP          | 1 M KOH   | 10 | 280 | 40.93 | S[33] |
| NiFeB                                            | GCE          | 1 M KOH   | 10 | 242 | 24    | S[34] |
| FeCo/Se–CNT                                      | GCE          | 0.1 M KOH | 10 | 340 | 60.9  | S[35] |
| Ir <sub>16</sub> –PdCu/C                         | RDE          | 0.1 M KOH | 10 | 284 | 48.9  | S[36] |
| Co-C@NiFe LDH                                    | GCE          | 1 M KOH   | 10 | 249 | 57.9  | S[37] |
| CoOOH HNSs                                       | GCE          | 1 M KOH   | 10 | 305 | 63    | S[38] |
| PHI–Co                                           | RDE          | 1 M KOH   | 10 | 324 | 44    | S[39] |
| V <sub>O</sub> –MnCo <sub>2</sub> O <sub>4</sub> | GCE          | 0.1 M KOH | 10 | 400 | 87    | S[40] |
| CoFeNiMnMoPi                                     | GC           | 1 M KOH   | 10 | 270 | 74    | S[41] |
| LiNiFe–BPO                                       | Ni foam      | 1 M KOH   | 10 | 215 | 37    | S[42] |
| Fe <sub>1</sub> (OH) <sub>x</sub> /P–C           | GCE          | 1 M KOH   | 10 | 320 | 41    | S[43] |
| Ni <sub>1.5</sub> Sn@triMPO <sub>4</sub>         | CC           | 1 M KOH   | 10 | 240 | 45.2  | S[44] |
| MoS <sub>x</sub> –sulphate                       | GCE          | 1 M KOH   | 10 | 260 | 47    | S[45] |
| CoFe–cyanide                                     | GCE          | 1 M KOH   | 10 | 293 | 57    | S[46] |
| LC–CoOOH NAs                                     | CFC          | 1 M KOH   | 10 | 294 | 70.73 | S[47] |
|                                                  |              |           | 20 | 310 |       |       |
| Ir–Ni(OH) <sub>2</sub>                           | GC           | 1 M KOH   | 10 | 270 | 45.2  | S[48] |
| NiCo-LDH@MOF                                     | Carbon cloth | 1 M KOH   | 10 | 289 | 55.2  | S[49] |
| Fe-CoP/Ni(OH) <sub>2</sub>                       | Ni foam      | 1 M KOH   | 10 | 206 | 32    | S[50] |
| La(CrMnFeCo <sub>2</sub> Ni)O <sub>3</sub>       | Ni foam      | 1 M KOH   | 10 | 325 | 51.2  | S[51] |
| LDH-Bir                                          | Ni foam      | 1 M KOH   | 10 | 258 | 43    | S[52] |
| OLC/Co-N-C                                       | RDE GCE      | 0.1 M KOH | 10 | 344 | 57.8  | S[53] |
| Co <sub>0.85</sub> Se <sub>1-x</sub> @C          | GCE          | 1 M KOH   | 10 | 231 | 57    | S[54] |
| PdNi/Ni@N-C                                      | RRDE         | 0.1 M KOH | 10 | 360 | 121   | S[55] |
| Co/Ni-CW                                         | Wood chip    | 0.1 M KOH | 10 | 330 | 68    | S[56] |
| NF-Na-Fe-P                                       | Ni foam      | 1 M KOH   | 10 | 261 | 39.68 | S[57] |

Note: glassy carbon (GC), Current density (*j*), glassy carbon electrode (GCE), carbon fiber cloth (CFC), Carbon Fiber Paper (CFP), rotating disk electrode (RDE).

**Table S4** Ni/Fe ratios in the NiFe LDHs under different feeding FeCl<sub>3</sub> concentration.

| FeCl <sub>3</sub> concentration (mmol/L) | Ni/Fe ratios |
|------------------------------------------|--------------|
| 2.96                                     | 3.63         |
| 4.93                                     | 1.91         |
| 7.40                                     | 1.32         |
| 11.10                                    | 0.80         |

## References

- S[1] G. Kresse, J. Furthmüller, *Phys. Rev. B*, 1996, **54**, 11169-86.
- S[2] P. E. Blöchl, *Phys. Rev. B*, 1994, **50**, 17953-79.
- S[3] J. P. Perdew, K. Burke, M. Phy. *Rev. Lett.* 1996, **77**, 3865-8.
- S[4] Y. Wang, Y. Yang, S. F. Jia, X. M. Wang, K. J. Lyu, Y. Q. Peng, H. Zheng, X. Wei, H. Ren, L. Xiao, J. B. Wang, D. A. Muller, H. D. Abruña, B. J. Hwang, J. T. Lu, L. Zhuang, *Nat. commun.*, 2019, **10**, 1506.
- S[5] Z. Cai, D. J. Zhou, M. Y. Wang, S.-M. Bak, Y. S. Wu, Z. S. Wu, Y. Tian, X. Y. Xiong, Y. P. Li, W. Liu, S. Siahrostami, Y. Kuang, X.-Q. Yang, H. H. Duan, Z. X. Feng, H. L. Wang, X. M. Sun, *Angew. Chem. Int. Ed.*, 2018, **57**, 9392-6.
- S[6] M. Arif, G. Yasin, M. Shakeel, M.A. Mushtaq, W. Ye, X. Fang, S. Ji, D. Yan, *Mater. Chem. Front.*, 2019, **3**, 520–531.
- S[7] H. Y. Si, Q. X. Deng, L. C. Chen, L. Wang, X. Y. Liu, W. S. Wu, Y. H. Zhang, J. M. Zhou, H. L. Zhang, *J. Alloy. Compd.*, 2019, **794**, 261–267.
- S[8] M. Gong, Y.G. Li, H.L. Wang, Y.Y. Liang, J.Z. Wu, J.G. Zhou, J. Wang, T. Regier, F. Wei, H.J. Dai, *J. Am. Chem. Soc.*, 2013, **135**, 8452–8455.
- S[9] L. M Tao, Y. B. Li, M. Li, G. Y. Gao, X. Xiao, M. K. Wang, X. X. Jiang, X. W. Lv, Q. W. Li, S. S. Zhang, Z. X. Zhao, C. Zhao, Y. Shen, *J. Phys. Chem. C*, 2017, **121**, 25888–25897.
- S[10] H. - C. Chen, T. - L. Chen, S.g - C. Lin, C. - S. Hsu, T. - S. Chan, M. - Y. Liao, H. Ming Chen, *ChemCatChem*, 2020, **12**, 1926-1933.
- S[11] S. Watzele, A. S. Bandarenka, *Electroanalysis*, 2016, 28, 2394-2399.
- S[12] F. Dionigi, Z. H. Zeng, I. Sinev, T. Merzdorf, S. Deshpande, M. B. Lopez, S. Kunze, I. Zegkinoglou, H. Sarodnik, D. X. Fan, A. Bergmann, J. Drnec, J. F. Araujo, M. Gliech, D. Teschner, J. Zhu, W. X. Li, J. Greeley, B. R. Cuenya, and P. Strasser, *Nat. Commun.*, 2020, **11**, 2522.
- S[13] C. C. Wu, H. Q. Li, Z. X. Xia, X. M. Zhang, R. Y. Deng, S. L. Wang, and G. Q. Sun, *ACS Catal.*, 2020, **10**, 11127–11135.
- S[14] H. Koshikawa, H. Murase, T. Hayashi, K. Nakajima, H. Mashiko, S. Shiraishi, and Y. Tsuji, *ACS Catal.*, 2020, **10**, 1886–1893.
- S[15] J. T. Zhang, L. Yu, Y. Chen, X. F. Lu, S. Y. Gao, and X. W. Lou, *Adv. Mater.* 2020, **32**, 1906432.
- S[16] W. Moschkowitsch, K. Dhaka, S. Gonen, R. Attias, Y. Tsur, M. C. Toroker, and L. Elbaz, *ACS Catal.*, 2020, **10**, 4879–4887.
- S[17] M. Zhang, Y. Q. Liu, B. Y. Liu, Z. Chen, H. Xu, and K. Yan, *ACS Catal.*, 2020, **10**, 5179–5189.
- S[18] H. J. Xu, C. F. Shan, X. X. Wu, M. Z. Sun, B. L. Huang, Y. Tang, and C. H. Yan, *Energ Environ. Sci.*, 2020, **13**, 2949–2956.
- S[19] H. K. Park, H. Ahn, T. H. Lee, J. Y. Lee, M. G. Lee, S. A. Lee, J. W. Yang, S. J. Kim, S. H. Ahn, S. Y. Kim, C. H. Lee, E. S. Park, and H. W. Jang, *Small Methods*, 2020, **5**, 2000755.
- S[20] M. Görlin, J. H. Stenlid, S. Koroidov, H. Y. Wang, M. Börner, M. Shipilin, A. Kalinko, V. Murzin, O. V. Safonova, M. Nachtegaal, A. Uheida, J. Dutta, M. Bauer, A. Nilsson, and O. Diaz-Morales, *Nat. Commun.*, 2020, **11**, 6181.
- S[21] Q. Q. Ji, Y. Kong, C. Wang, H. Tan, H. L. Duan, W. Hu, G. N. Li, Y. Lu, N. Li, Y. Wang, J. Tian, Z. M. Qi, Z. H. Sun, F. C. Hu, and W. S. Yan, *ACS Catal.*, 2020, **10**, 5691–5697.



- S[22] X. Bo, R. K. Hocking, S. Zhou, Y. B. Li, X. J. Chen, J. C. Zhuang, Y. Du, and C. Zhao, *Energ Environ. Sci.*, 2020, **11**, 4225–4237.
- S[23] N. Yu, W. Cao, M. Huttula, Y. Kayser, P. Hoenicke, B. Beckhoff, F. Y. Lai, R. Dong, H. X. Sun, and B. Y. Geng, *Appl. Catal. B*, 2020, **261**, 118193.
- S[24] M. Wang, Y. Q. Wang, S. S. Mao, and S. H. Shen, *Nano Energy*, 2021, **88**, 106216.
- S[25] T. X. Nguyen, Y. H. Su, C. C. Lin, J. Ruan, and J. M. Ting, *Adv. Sci.*, 2021, **8**, 2002446.
- S[26] F. Luo, J. B. Zhu, S. X. Ma, M. Li, R. Z. Xu, Q. Zhang, Z. H. Yang, K. G. Qu, W. W. Cai, and Z. W. Chen, *Energy Stor. Mater.*, 2021, **35**, 723–730.
- S[27] G. X. Zhang, Y. L. Li, X. Xiao, Y. Shan, Y. Bai, H. G. Xue, H. Pang, Z. Q. Tian, and Q. Xu, *Nano Lett.*, 2021, **21**, 3016–3025.
- S[28] S. McGee, Y. Lei, J. Goff, C. J. Wilkinson, N. N. Nova, C. M. Kindle, F. Zhang, K. Fujisawa, E. Dimitrov, S. B. Sinnott, I. Dabo, M. Terrones, and L. D. Zarzar, *ACS Nano*, 2021, **15**, 9796–9807.
- S[29] G. W. Xiong, Y. K. Chen, Z. Q. Zhou, F. Liu, X. Y. Liu, L. J. Yang, Q. L. Liu, Y. H. Sang, H. Liu, X. L. Zhang, J. Jia, and W. J. Zhou, *Adv. Funct. Mater.*, 2021, **31**, 2009580.
- S[30] R. F. Tian, S. J. Zhao, J. K. Li, Z. B. Chen, W. F. Peng, Y. He, L. L. Zhang, S. Yan, L. L. Wu, R. Ahuja, and H. Y. Gou, *J. Mater. Chem. A*, 2021, **9**, 6469–6475.
- S[31] J. Jiang, Y. J. Zhang, X. J. Zhu, S. Lu, L. L. Long, and J. J. Chen, *Nano Energy*, 2020, **81**, 105619.
- S[32] Y. F. Zhao, J. Q. Zhang, Y. H. Xie, B. Sun, J. J. Jiang, W. J. Jiang, S. B. Xi, H. Y. Yang, K. Yan, S. J. Wang, X. Guo, P. Li, Z. J. Han, X. Y. Lu, H. Liu, and G. X. Wang, *Nano Lett.*, 2021, **21**, 823–832.
- S[33] Y. J. Guo, C. R. Zhang, J. H. Zhang, K. Dastafkan, K. Wang, C. Zhao, and Z. Q. Shi, *ACS Sustain. Chem. Eng.*, 2021, **9**, 2047–2056.
- S[34] W. Z. Cai, R. Chen, H. B. Yang, H. B. Tao, H. Y. Wang, J. J. Gao, W. Liu, S. Liu, S. F. Hung and B. Liu, *Nano Lett.*, 2020, **20**, 4278–4285.
- S[35] H. W. Zhang, M. Q. Zhao, H. R. Liu, S. R. Shi, Z. H. Wang, B. Zhang, L. Song, J. Z. Shang, Y. Yang, C. Ma, L. R. Zheng, Y. H. Han and W. Huang, *Nano Lett.*, 2021, **21**, 2255–2264.
- S[36] Y. N. Qin, Z. C. Wang, W. H. Yu, Y. J. Sun, D. Wang, J. P. Lai, S. J. Guo and L. Wang, *Nano Lett.*, 2021, **21**, 5774–5781.
- S[37] W. M. Li, S. H. Chen, M. X. Zhong, C. Wang and X. F. Lu, *Chem. Eng. J.*, 2021, **415**, 128879.
- S[38] Q. L. Hong, Q. G. Zhai, X. L. Liang, Y. Yang, F. M. Li, Y. C. Jiang, M. C. Hu, S. N. Li and Y. Chen, *J. Mater. Chem. A*, 2021, **9**, 3297–3302.
- S[39] M. Y. Ye, S. Li, X. J. Zhao, N. V. Tarakina, C. Teutloff, W. Y. Chow, R. Bittl and A. Thomas, *Adv. Mater.*, 2020, **32**, 1903942.
- S[40] K. Zeng, W. Li, Y. Zhou, Z. H. Sun, C. Y. Lu, J. Yan, J. H. Choi and R. Z. Yang, *Chem. Eng. J.*, 2021, **421**, 127831.
- S[41] H. Y. Qiao, X. Z. Wang, Q. Dong, H. K. Zheng, G. Chen, M. Hong, C. P. Yang, M. L. Wu, K. He and L. B. Hu, *Nano Energy*, 2021, **86**, 106029.
- S[42] Jiseok Kwon, Hyuksu Han, Seonghan Jo, Seunggun Choi, Kyung Yoon Chung, Ghulam Ali and Keemin Park, *Adv. Energy Mater.*, 2021, **11**, 2100624.
- S[43] Z. R. Zhang, C. Feng, X. Y. Li, C. X. Liu, D. D. Wang, R. Si, J. L. Yang, S. M. Zhou and J. Zeng, *Nano Lett.*, 2021, **21**, 4795–4801.

- S[44] S. L. Li, Z. C. Li, R. G. Ma, C. L. Gao, L. L. Liu, L. P. Hu, J. L. Zhu, T. M. Sun, Y. F. Tang, D. Liu and J. C. Wang, *Angew. Chem. Int. Ed.*, 2021, **60**, 3773–3780.
- S[45] Y. H. Gan, X. P. Dai, M. L. Cui, H. H. Zhao, F. Nie, Z. T. Ren, X. L. Yin, Z. H. Yang, B. Q. Wu, Y. H. Cao and X. Zhang, *J. Mater. Chem. A*, 2021, **9**, 9858–9863.
- S[46] Y. Q. Feng, P. P. Dong, L. Y. Cao, X. Wang, J. Wang, H. Wang, W. H. Feng, J. S. Chen, L. L. Feng, C. Z. He and J. F. Huang, *J. Mater. Chem. A*, 2021, **9**, 2135–2144.
- S[47] S. H. Ye, J. P. Wang, J. Hu, Z. D. Chen, L. R. Zheng, Y. H. Fu, Y. Q. Lei, X. Z. Ren, C. X. He, Q. L. Zhang and J. H. Liu, *ACS Catal.*, 2021, **11**, 6104–6112.
- S[48] J. L. Liu, J. X. Xiao, Z. Y. Wang, H. M. Yuan, Z. G. Lu, B. C. Luo, E. K. Tian and G. I. N. Waterhouse, *ACS Catal.*, 2021, **11**, 5386–5395.
- S[49] M. Y. Han, X. W. Zhang, H. Y. Gao, S. Y. Chen, P. Cheng, P. Wang, Z. Y. Zhao, R. Dang and G. Wang, *Chem. Eng. J.*, 2021, **426**, 131348.
- S[50] X. W. Yu, J. Zhao and M. Johnsson, *Adv. Funct. Mater.*, 2021, **31**, 2101578.
- S[51] T. X. Nguyen, Y. C. Liao, C. C. Lin, Y. S. Su and J. M. Ting, *Adv. Funct. Mater.*, 2021, **31**, 2101632.
- S[52] Z. W. Chen, M. Ju, M. Z. Sun, L. Jin, R. M. Cai, Z. Wang, L. Dong, L. M. Peng, X. Long, B. L. Huang and S. H. Yang, *Angew. Chem. Int. Ed.*, 2021, **60**, 9699–9705.
- S[53] Z. Z. Liang, N. N. Kong, C. X. Yang, W. Zhang, H. Q. Zheng, H. P. Lin and R. Cao, *Angew. Chem. Int. Ed.*, 2021, **60**, 12759–12764.
- S[54] L. Zhang, C. J. Lu, F. Ye, R. L. J. Pang, Y. Liu, Z. Y. Wu, Z. P. Shao, Z. M. Sun and L. F. Hu, *Adv. Mater.*, 2021, **33**, 2007523.
- S[55] Z. J. Li, H. Li, M. Li, J. R. Hu, Y. Y. Liu, D. M. Sun, G. T. Fu and Y. W. Tang, *Energy Stor. Mater.*, 2021, **42**, 118–128.
- S[56] W. T. Gan, L. P. Wu, Y. X. Wang, H. Gao, L. K. Gao, S. L. Xiao, J. Q. Liu, Y. J. Xie, T. Li and J. Li, *Adv. Funct. Mater.*, 2021, **31**, 2010951.
- S[57] Y. Zhao, Y. X. Gao, Z. Chen, Z. J. Li, T. Y. Ma, Z. X. Wu and L. Wang, *Appl. Catal. B.*, 2021, **297**, 120395.
